# Supplementary figures and images for: Synthesis and characterization of multicomponent Cu2(FexZn1−x)SnS4 nanocrystals with tunable band gap and structure
Source: Royal Society of Chemistry journal article supplement (doi:10.1039/c3ta00191a), 2013-01-01

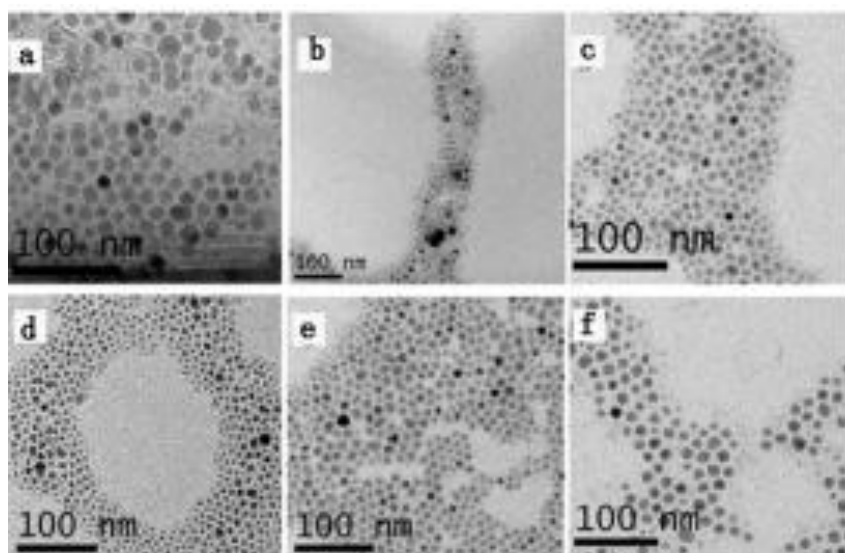

Fig. S1

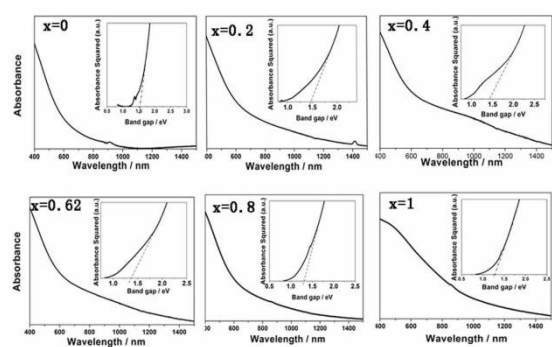

Fig. S2

Supplement: c3ta00191a.pdf [file c3ta00191a.pdf]
